# Supplementary material
Source: PubMed Central journal article supplement (PMC5710194)
Supplement: jamaoncol-3-1487-s001.pdf [file jamaoncol-3-1487-s001.pdf]

## Supplementary Online Content

Leeman JE, Li J-g, Pei X, et al. Patterns of treatment failure and postrecurrence outcomes among patients with locally advanced head and neck squamous cell carcinoma after chemoradiotherapy using modern radiation techniques. *JAMA Oncol*. Published online May 25, 2017. doi:10.1001/jamaoncol.2017.0973

### **eAppendix.** Methods

**eTable 1.** Baseline Characteristics

**eTable 2.** Patient Characteristics at the Time of Recurrence

**eTable 3.** Locations of Regional Nodal Failures in Relation to IMRT Treatment Fields Across Disease Subsites

**eTable 4.** Oral Cavity Regional Nodal Failures and Relationship to Neck Dissection

**eTable 5.** First Organs of Distant Metastasis Across HNSCC Subsites

**eTable 6.** Burden of Metastatic Disease Across Head and Neck Squamous Cell Carcinoma Subsites

**eFigure 1.** Cumulative Incidence of (A) Local, (B) Regional and (C) Distant Failure in HPV/p16+ vs HPV/p16– Oropharyngeal Squamous Cell Carcinoma

**eFigure 2.** Patterns of Failure Across Subsites

**eFigure 3.** Survival Following Locoregional Recurrence According to Receipt of Salvage Surgery

**eFigure 4.** Patterns of Regional Nodal Failure Across Head and Neck Squamous Cell Carcinoma Subsites

**eFigure 5.** Examples of Out-of-Field Superficial Anterior Cervical Node Failures in Patients With Oral Cavity Squamous Cell Carcinoma Following Postoperative Intensity Modulated Radiation Therapy

**eFigure 6.** Examples of Regional Failures Contralateral to the Dissected Neck in Oral Cavity Patients Treated With Postoperative IMRT

**eFigure 7.** Survival Following Metastasis According to Receipt of Palliative Systemic Therapy Regimen Containing Cetuximab

**eFigure 8.** Survival Following Distant Metastasis According to Human Papillomavirus (HPV)/p16 Status

### **eReferences.**

This supplementary material has been provided by the authors to give readers additional information about their work.

## eAppendix. Methods

### Radiotherapy techniques

Primary gross tumor volume (GTV) included all discernible gross disease appreciated on clinical examination, nasopharyngoscopy, imaging and operative and pathology reports. Primary nodal GTV included all proven or suspicious (>1 cm, necrotic, enhancing, or FDG avid) lymph nodes. The high risk clinical target volume (CTV<sub>59,4-60</sub>) at the primary site was defined as GTV plus a margin of 1.0-cm to 1.5-cm. For OPC, in the node positive neck, CTV<sub>59,4-60</sub> included levels II-IVa+b and retropharyngeal (RP) lymph nodes. In the node negative neck, CTV<sub>54</sub> included levels II-IVa and the RP nodes. For LRX, the high-risk clinical tumor volume (CTV<sub>59,4-60</sub>) encompassed the supraglottic, glottic and subglottic larynx, as well bilateral cervical levels II-IV and level VIa. For HPX, the high-risk clinical tumor volume (CTV<sub>59,4-60</sub>) margin around the GTV based on patterns of failure for the hypopharynx, including the bilateral RP nodes and levels II-IV. For OPC, LRX, and HPX, levels I and V were included when clinically involved or at risk. As data emerged over the course of the study period regarding low risk of cervical nodal failures in specific lymph node basins in OPC patients, we gradually removed these areas from our elective nodal volumes. These include level V (2009), level IB (2011) and higher retropharyngeal nodes in the uninvolved neck (2013)<sup>1-4</sup>. Our current HNSCC target delineation practices have been previously described in detail<sup>5</sup>.

For OCC, details regarding delineation of target structures, total doses, and dose per fraction specifications used at MSKCC have been previously described in detail<sup>6</sup>. The CTV<sub>60-66</sub> included the post-operative bed within the oral cavity. If margins were positive or close, the dose was increased to 66 Gy. The involved neck was included in the CTV<sub>60-66</sub> with areas of pathologic extranodal extension boosted to 66 Gy. The contralateral uninvolved neck was included in the CTV<sub>54</sub>. PTV margin expansions were the same as used for definitive IMRT cases. In the presence of gross disease, The PTV<sub>70</sub> was defined as the CTV<sub>70</sub> plus a margin of 0.3-cm to 0.5-cm, and the PTV<sub>59,4-60</sub> and PTV<sub>54</sub> were defined as their respective CTVs plus an identical margin range.

In the definitive setting, dose was prescribed in one of two ways: either with 2.12 Gy, 1.8 Gy, and 1.64 Gy daily fractions over a course of 33 days to the PTV<sub>70</sub>, PTV<sub>59,4</sub>, and PTV<sub>54</sub>, respectively, or with a cone-down technique with 2 Gy daily fractions to PTV<sub>70</sub> and PTV<sub>60</sub> and 1.8 Gy daily fractions to PTV<sub>54</sub> for 30 days followed by 5 additional 2 Gy fractions to PTV<sub>70</sub>. The lower neck was either included in the IMRT fields or included in a low anterior neck field matched to the IMRT fields. Treatment planning was performed using an in-house treatment planning software.

### Regional nodal failure mapping

Regional nodal failures were delineated on diagnostic imaging and co-registered with the original treatment planning CT. The failure was classified as in-field, marginal or out-of-field based on the relative volumes of the recurrent nodes covered by the 95% prescription isodose region in the original treatment plan. In-field was defined as 95% of the lesion within the 95% isodose, marginal as 20-95% within the 95% isodose and out-

of-field as <20% within the 95% isodose. This classification was used for GTV dose levels (70 Gy) as well as CTV dose levels (54-66 Gy). In this way, recurrences were defined as in-field GTV, in-field CTV, marginal or out-of-field. The distributions of the recurrent nodes were then documented according to the cervical nodal levels. In cases of recurrence spanning multiple cervical nodal levels, the recurrence was enumerated for each involved level.

### **Salvage treatment**

Locoregional salvage treatment following locoregional recurrence was documented for each case. Salvage surgery was defined as excision of recurrent disease with definitive or palliative intent including resection of disease at the primary site of local failure and/or cervical neck dissection of any kind. The decision to undergo salvage surgery was based on the decision of the multidisciplinary team. Reasons for not undergoing salvage surgery include synchronous distant metastasis, unresectable disease, poor performance status and patient refusal. Salvage re-irradiation was defined as the administration of a second course of radiation to a previously treated recurrent site as part of a treatment regimen with definitive or palliative intent. Salvage radiation treatment modalities included photon IMRT, proton therapy, brachytherapy or intraoperative radiation. For patients who received fractionated photon or proton re-irradiation, treatment was performed +/- concurrent radiosensitizing chemotherapy.

**eTable 1.** Baseline Characteristics

|                         | <b>Oropharynx</b> | <b>Oral cavity</b> | <b>Larynx</b> | <b>Hypopharynx</b> |
|-------------------------|-------------------|--------------------|---------------|--------------------|
| <b>N</b>                | 703               | 125                | 126           | 46                 |
| <b>Age</b>              |                   |                    |               |                    |
| Median                  | 57                | 62                 | 63            | 64                 |
| Range                   | 25-91             | 20-92              | 34-89         | 47-91              |
| <b>Gender</b>           |                   |                    |               |                    |
| Male                    | 616 (88)          | 74 (59)            | 86 (68)       | 38 (83)            |
| Female                  | 87 (12)           | 51 (41)            | 40 (32)       | 8 (17)             |
| <b>KPS</b>              |                   |                    |               |                    |
| Median                  | 90                | 90                 | 90            | 90                 |
| Range                   | 60-100            | 50-100             | 60-100        | 70-100             |
| <b>p16/HPV Status</b>   |                   |                    |               |                    |
| Positive                | 334 (48)          |                    |               |                    |
| Negative                | 66 (9)            |                    |               |                    |
| Unknown                 | 303 (43)          |                    |               |                    |
| <b>T classification</b> |                   |                    |               |                    |
| T1                      | 188 (27)          | 24 (19)            | 8 (6)         | 9 (20)             |
| T2                      | 298 (42)          | 40 (32)            | 24 (19)       | 12 (26)            |
| T3                      | 132 (19)          | 8 (6)              | 71 (56)       | 17(37)             |
| T4                      | 85 (12)           | 53 (42)            | 23 (18)       | 8 (17)             |
| <b>N classification</b> |                   |                    |               |                    |
| N0                      | 27 (4)            | 21 (17)            | 48 (38)       | 4 (9)              |
| N1                      | 127 (18)          | 36 (29)            | 22 (17)       | 10 (22)            |
| N2                      | 532 (76)          | 68 (54)            | 52 (41)       | 27 (59)            |
| N3                      | 17 (2)            | 0 (0)              | 4 (3)         | 5 (11)             |

|                                    |          |         |         |         |
|------------------------------------|----------|---------|---------|---------|
| <b>Stage (AJCC)</b>                |          |         |         |         |
| III                                | 129 (18) | 36 (29) | 57 (45) | 12 (26) |
| IV                                 | 574 (82) | 89 (71) | 69 (55) | 34 (74) |
| <b>Concurrent Systemic therapy</b> |          |         |         |         |
| 3-weekly cisplatin                 | 454 (65) | 29 (23) | 87 (69) | 27 (59) |
| Weekly cisplatin                   | 9 (1)    | 8 (6)   | 9 (7)   | 1 (2)   |
| Cetuximab                          | 82 (12)  | 6 (5)   | 9 (7)   | 4 (9)   |
| Carbo + 5-FU                       | 51 (7)   | 4 (3)   | 9 (7)   | 4 (9)   |
| Cisplatin + bev                    | 39 (6)   | 0 (0)   | 0 (0)   | 0 (0)   |
| Carbo + paclitaxel                 | 27 (4)   | 4 (3)   | 6 (5)   | 7 (15)  |
| Other                              | 28 (4)   | 0 (0)   | 4 (3)   | 0 (0)   |
| None                               | 13 (2)   | 74 (59) | 2 (2)   | 3 (7)   |

KPS=Karnofsky performance status, HPV=human papillomavirus.

**eTable 2.** Patient Characteristics at the Time of Recurrence

|                                           | Locoregional failure | Distant failure |
|-------------------------------------------|----------------------|-----------------|
| <b>N</b>                                  | 147                  | 143             |
| <b>Gender</b>                             |                      |                 |
| Male                                      | 116 (79%)            | 118 (83%)       |
| Female                                    | 31 (21%)             | 25 (17%)        |
| <b>Age at progression</b> (median, range) | 63 (34-92)           | 61 (28-88)      |
| <b>KPS at progression</b> (median, range) | 90 (50-100)          | 80 (40-100)     |
| <b>Subsite</b>                            |                      |                 |
| Oropharynx                                | 71 (48%)             | 87 (61%)        |
| HPV/p16+                                  | 29 (20%)             | 42 (48%)        |
| HPV/p16-                                  | 19 (13%)             | 15 (17%)        |
| HPV/p16 unknown                           | 23 (16%)             | 30 (34%)        |
| Oral cavity                               | 35 (24%)             | 19 (13%)        |
| Larynx                                    | 27 (18%)             | 23 (16%)        |
| Hypopharynx                               | 14 (10%)             | 56 (39%)        |

KPS=Karnofsky performance status.

**eTable 3.** Locations of Regional Nodal Failures in Relation to IMRT Treatment Fields Across Disease Subsites

|                                                | <b>In-field GTV</b> | <b>In-field CTV</b> | <b>In-field GTV and CTV</b> | <b>In-field GTV/CTV and Out-of-field</b> | <b>Marginal</b> | <b>Out of field only</b> |
|------------------------------------------------|---------------------|---------------------|-----------------------------|------------------------------------------|-----------------|--------------------------|
| <b>Oropharynx</b>                              | 34 (4.8%)           | 6 (0.8%)            | 4 (0.6%)                    | 0 (0%)                                   | 0 (0%)          | 0 (0%)                   |
| HPV/p16-                                       | 8 (12.1%)           | 0                   | 1 (1.5%)                    | 0 (0%)                                   | 0 (0%)          | 0 (0%)                   |
| HPV/p16+                                       | 16 (4.8%)           | 4 (1.2%)            | 2 (0.6%)                    | 0 (0%)                                   | 0 (0%)          | 0 (0%)                   |
| HPV/p16 unknown                                | 10 (3.3%)           | 2 (0.7%)            | 1 (0.3%)                    | 0 (0%)                                   | 0 (0%)          | 0 (0%)                   |
| <b>Larynx</b>                                  | 5 (4.0%)            | 1 (0.8%)            | 5 (4.0%)                    | 1 (0.8%)                                 | 0 (0%)          | 0 (0%)                   |
| <b>Hypopharynx</b>                             | 4 (8.7%)            | 1 (2.2%)            | 2 (4.3%)                    | 0 (0%)                                   | 0 (0%)          | 0 (0%)                   |
| <b>Total Non-oral cavity (definitive IMRT)</b> | 43 (4.9%)           | 8 (0.9%)            | 11 (1.3%)                   | 1 (0.1%)                                 | 0 (0%)          | 0 (0%)                   |
| <b>Oral cavity</b>                             | NA                  | 12 (9.6%)*          | NA                          | 3 (2.4%)                                 | 0 (0%)          | 0 (0%)                   |

GTV=gross tumor volume, CTV=clinical tumor volume, HPV=human papillomavirus, IMRT=intensity modulated radiation therapy. \*Of 12 In-field CTV failures in oral cavity cases, 7 occurred outside of areas of prior gross disease, 2 occurred in areas of prior gross disease and 3 failed in both areas of gross disease and outside.

**eTable 4.** Oral Cavity Regional Nodal Failures and Relationship to Neck Dissection

| Oral cavity regional nodal failures (n=15)                     |                                    |           |
|----------------------------------------------------------------|------------------------------------|-----------|
| <b>Neck dissection</b>                                         | None                               | 0 (0%)    |
|                                                                | Unilateral                         | 15 (100%) |
|                                                                | Bilateral                          | 0 (0%)    |
| <b>N-stage</b>                                                 | pN0                                | 2 (13%)   |
|                                                                | pN1                                | 2 (13%)   |
|                                                                | pN2a                               | 0 (0%)    |
|                                                                | pN2b                               | 11 (73%)  |
|                                                                | pN2c                               | 0 (0%)    |
|                                                                | pN3                                | 0 (0%)    |
| <b>Location of recurrent nodes relative to neck dissection</b> | In dissected region                | 3 (20%)   |
|                                                                | Contralateral                      | 9 (60%)   |
|                                                                | Both ipsilateral and contralateral | 3 (20%)   |

All patients with recurrent regional nodes had undergone unilateral neck dissection. The majority of failures involved recurrence contralateral to the dissected region.



**eTable 5.** First Organs of Distant Metastasis Across HNSCC Subsites

|                                        | Oropharynx         |                    |                              | Oral cavity<br>(N=19) | Larynx<br>(N=23) | Hypopharynx<br>(N=14) | Total<br>(N=143) |
|----------------------------------------|--------------------|--------------------|------------------------------|-----------------------|------------------|-----------------------|------------------|
|                                        | HPV/p16+<br>(N=42) | HPV/p16-<br>(N=15) | HPV/p16<br>unknown<br>(N=30) |                       |                  |                       |                  |
| Lung                                   | 31 (74%)           | 11 (73%)           | 27 (90%)                     | 17<br>(89%)           | 21<br>(91%)      | 7 (50%)               | 114 (80%)        |
| Lymph node<br>(below<br>clavicles<br>) | 15 (36%)           | 5 (33%)            | 15 (50%)                     | 7<br>(37%)            | 9 (39%)          | 6 (43%)               | 57 (40%)         |
| Brain                                  | 0 (0%)             | 0 (0%)             | 1 (3%)                       | 0 (0%)                | 0 (0%)           | 0 (0%)                | 1 (1%)           |
| Liver                                  | 3 (7%)             | 1 (7%)             | 6 (20%)                      | 0 (0%)                | 1 (4%)           | 2 (14%)               | 13 (9%)          |
| Skin                                   | 1 (2%)             | 0 (0%)             | 0 (0%)                       | 1 (5%)                | 1 (4%)           | 0 (0%)                | 3 (2%)           |
| Kidney                                 | 0 (0%)             | 0 (0%)             | 0 (0%)                       | 0 (0%)                | 1 (4%)           | 0 (0%)                | 1 (1%)           |
| Bone                                   | 7 (17%)            | 2 (13%)            | 8 (27%)                      | 4<br>(21%)            | 4 (17%)          | 3 (21%)               | 28 (20%)         |
| Soft<br>tissue                         | 3 (7%)             | 1 (7%)             | 2 (7%)                       | 0 (0%)                | 2 (9%)           | 1 (7%)                | 9 (6%)           |
| Bowel                                  | 1 (2%)             | 0 (0%)             | 0 (0%)                       | 0 (0%)                | 1 (4%)           | 0 (0%)                | 2 (1%)           |
| Heart                                  | 0 (0%)             | 0 (0%)             | 0 (0%)                       | 1<br>(53%)            | 0 (0%)           | 1 (7%)                | 2 (1%)           |
| Adrenal                                | 0 (0%)             | 0 (0%)             | 1 (3%)                       | 0 (0%)                | 0 (0%)           | 0 (0%)                | 1 (1%)           |

HPV=human papillomavirus.

**eTable 6.** Burden of Metastatic Disease Across Head and Neck Squamous Cell

Carcinoma Subsites

| # of metastases | N  | OPC      | HPV/p16+ OPC | HPV/p16- OPC | HPV/p16 unknown OPC | OCC     | LRX      | HPX      |
|-----------------|----|----------|--------------|--------------|---------------------|---------|----------|----------|
| 1               | 19 | 12 (63%) | 7 (37%)      | 3 (16%)      | 2 (11%)             | 4 (21%) | 2 (11%)  | 1 (5%)   |
| 2-4             | 64 | 47 (73%) | 23 (36%)     | 9 (14%)      | 15 (23%)            | 7 (11%) | 7 (11%)  | 3 (5%)   |
| 5               | 60 | 28 (5%)  | 12 (20%)     | 3 (5%)       | 13 (22%)            | 8 (13%) | 14 (23%) | 10 (17%) |

**eFigure 1.** Cumulative Incidence of (A) Local, (B) Regional and (C) Distant Failure in HPV/p16+ vs HPV/p16- Oropharyngeal Squamous Cell Carcinoma

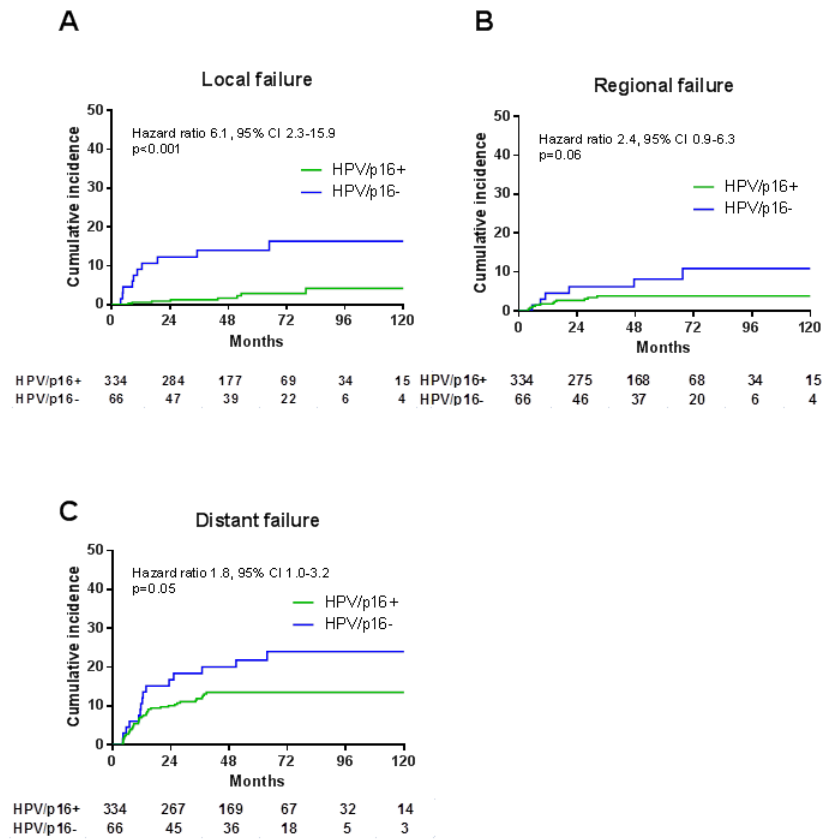

HPV=human papillomavirus.

**eFigure 2.** Patterns of Failure Across Subsites

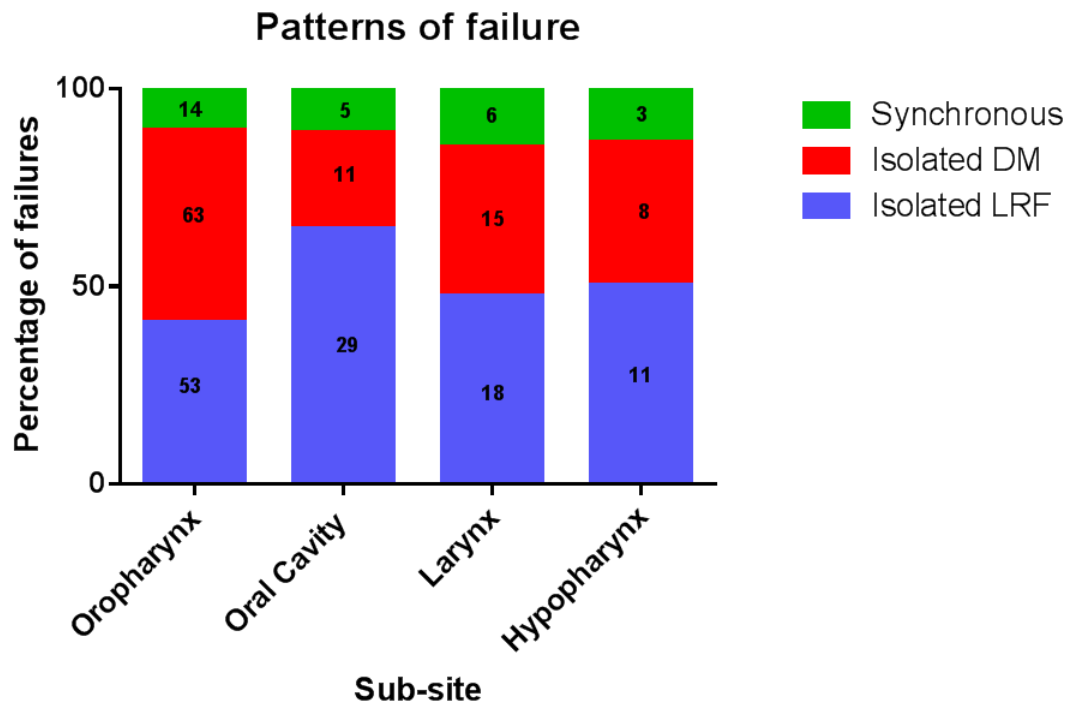

DM=distant metastasis, LRF=locoregional failure.

**eFigure 3.** Survival Following Locoregional Recurrence According to Receipt of Salvage Surgery

### Survival following locoregional recurrence

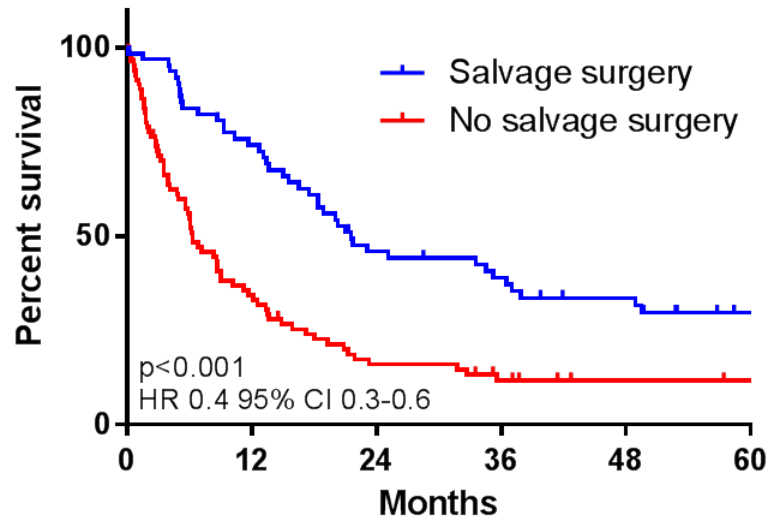

|                    |    |    |    |    |    |    |
|--------------------|----|----|----|----|----|----|
| Salvage surgery    | 64 | 46 | 28 | 23 | 18 | 11 |
| No salvage surgery | 83 | 28 | 13 | 8  | 4  | 3  |

HR=hazard ratio, CI=confidence interval.

**eFigure 4.** Patterns of Regional Nodal Failure Across Head and Neck Squamous Cell Carcinoma Subsites

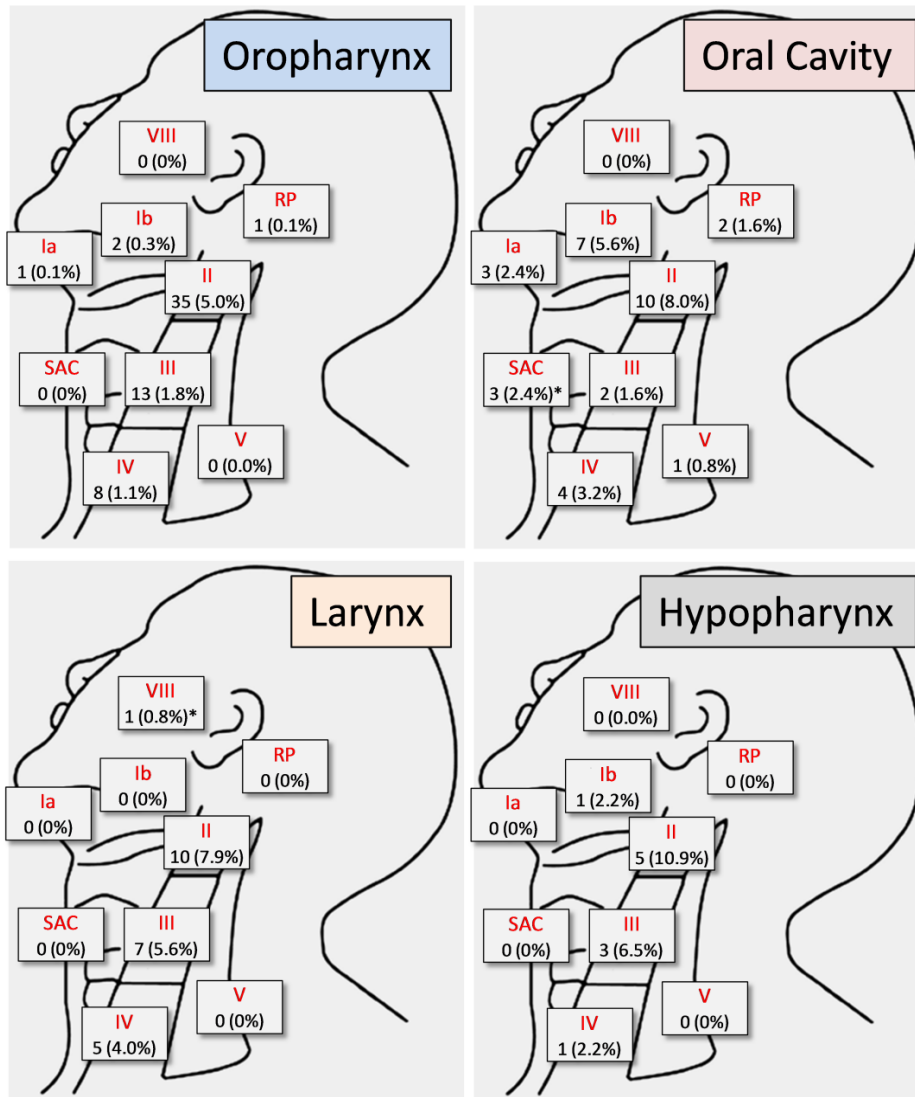

Failures that occurred outside of the radiation field are indicated with \*. All other failures occurred within the radiation field, no marginal failures were observed. SAC=superficial anterior cervical lymph nodes, RP=retropharyngeal lymph nodes.

**eFigure 5.** Examples of Out-of-Field Superficial Anterior Cervical Node Failures in Patients With Oral Cavity Squamous Cell Carcinoma Following Postoperative Intensity Modulated Radiation Therapy

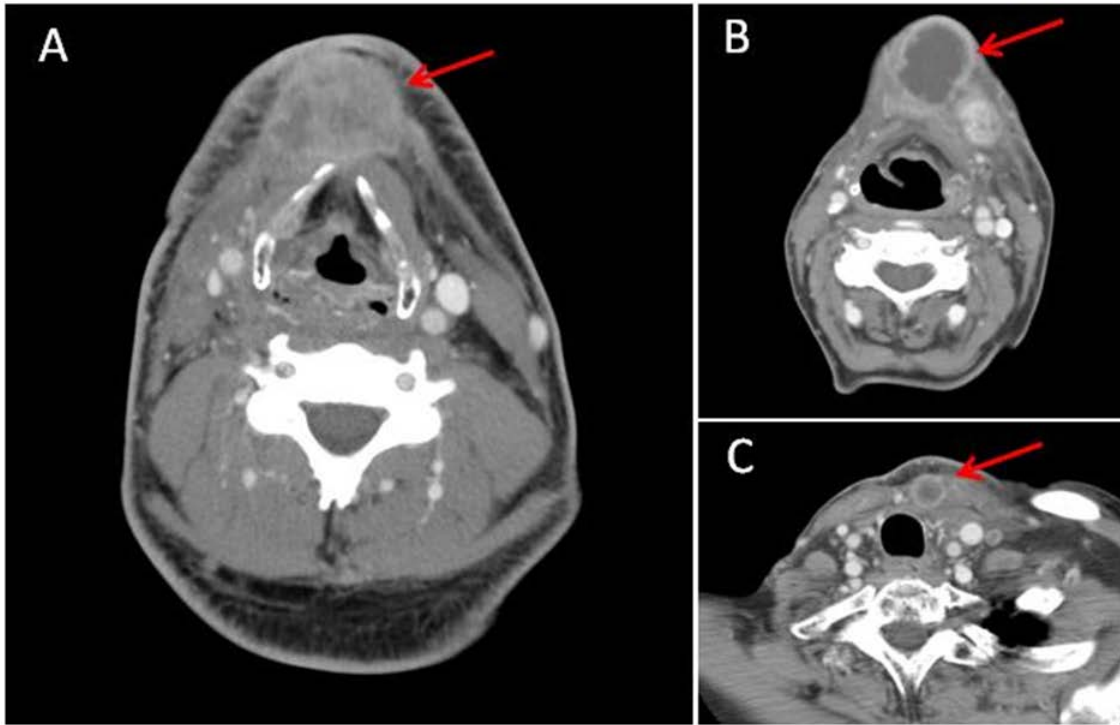

(B) and (C) demonstrate the same patient.

**eFigure 6.** Examples of Regional Failures Contralateral to the Dissected Neck in Oral Cavity Patients Treated With Postoperative IMRT

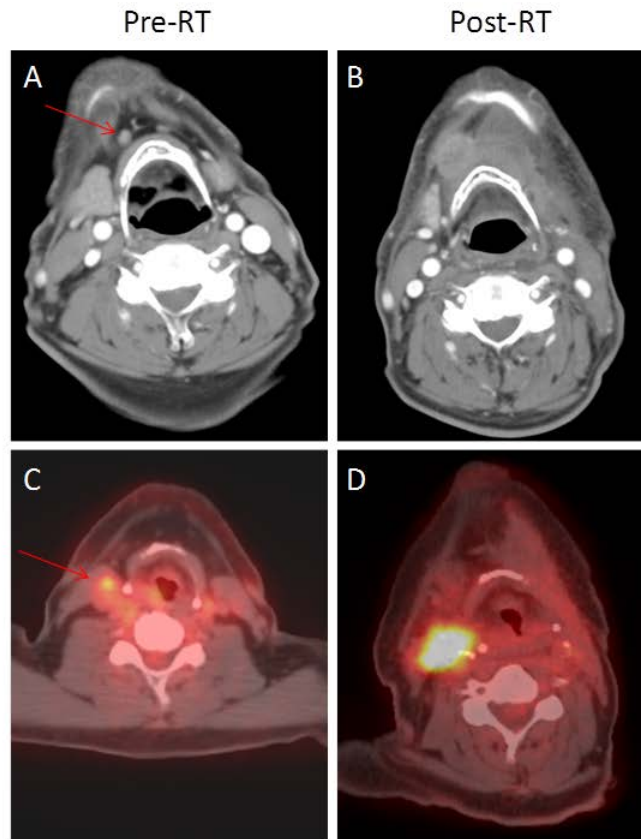

A 66 year old man with pT2N2b squamous cell carcinoma of the buccal mucosa underwent resection and left modified radical neck dissection. A small right level Ib node was present (A) post-operatively. Recurrence developed at this site 4 months following cetuximab-IMRT (B). A 65 year old man with pT4aN2b SCC of the left oral tongue underwent resection with left modified radical neck dissection. Post-operative imaging revealed a mildly avid right level III node (C). Recurrence developed at this site 10 months following cisplatin-IMRT (D).



**eFigure 7.** Survival Following Metastasis According to Receipt of Palliative Systemic Therapy Regimen Containing Cetuximab

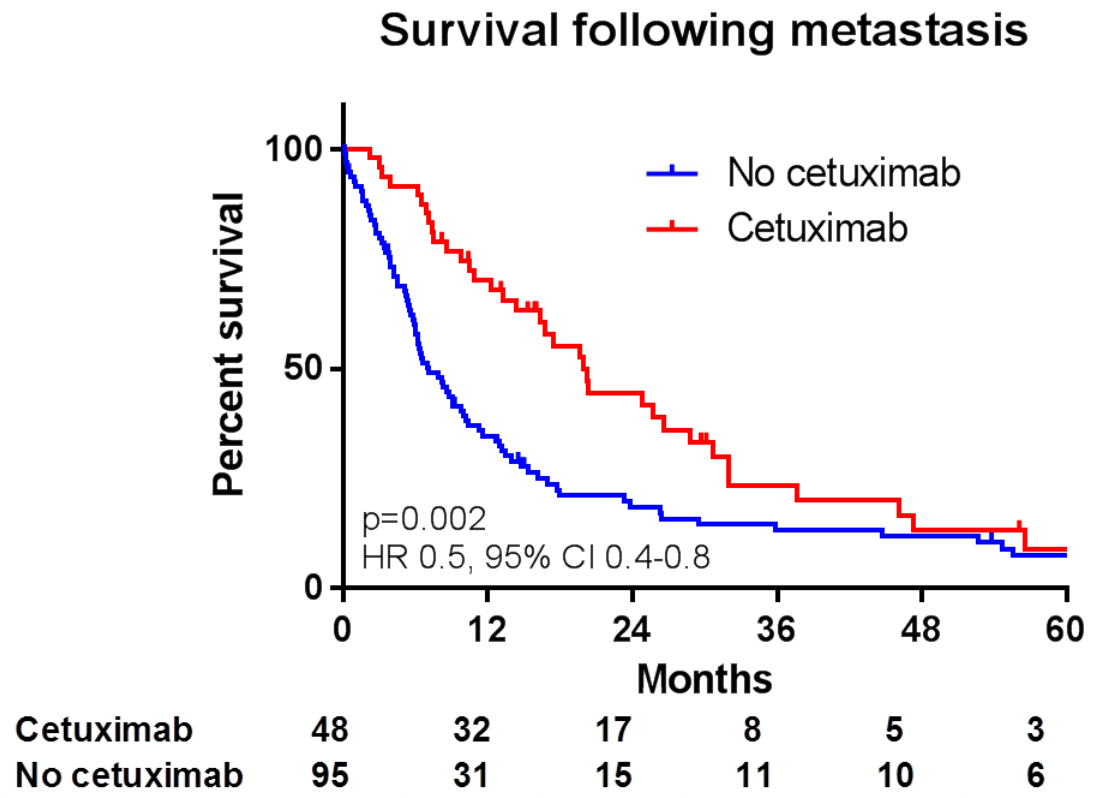

HR=Hazard ratio, CI=Confidence interval.

**eFigure 8.** Survival Following Distant Metastasis According to Human Papillomavirus (HPV)/p16 Status

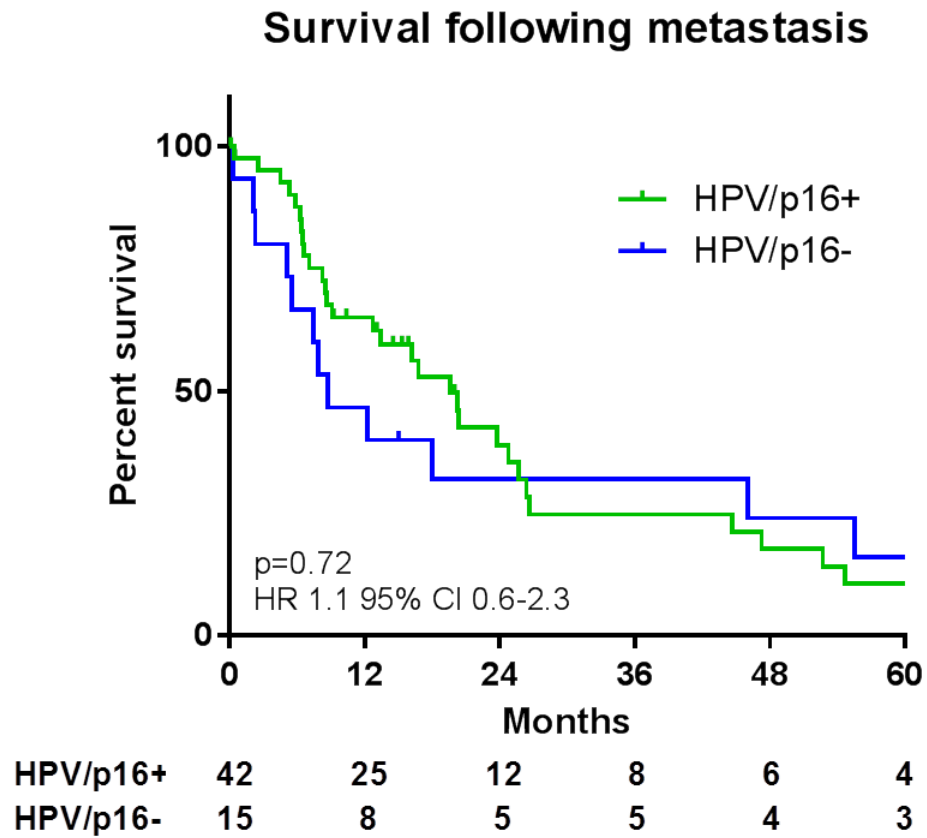

HR=Hazard ratio, CI=Confidence interval.

## eReferences.

1. Sanguineti G, Califano J, Stafford E, et al. Defining the risk of involvement for each neck nodal level in patients with early T-stage node-positive oropharyngeal carcinoma. *International journal of radiation oncology, biology, physics*. 2009;74(5):1356-1364.
2. Gutiontov S, Leeman J, Lok B, et al. Cervical nodal level V can safely be omitted in the treatment of locally advanced oropharyngeal squamous cell carcinoma with definitive IMRT. *Oral oncology*. 2016;58:27-31.
3. Tam M, Riaz N, Kannarunimit D, et al. Sparing bilateral neck level IB in oropharyngeal carcinoma and xerostomia outcomes. *American journal of clinical oncology*. 2015;38(4):343-347.
4. Spencer CR, Gay HA, Haughey BH, et al. Eliminating radiotherapy to the contralateral retropharyngeal and high level II lymph nodes in head and neck squamous cell carcinoma is safe and improves quality of life. *Cancer*. 2014;120(24):3994-4002.
5. Lee NY, Lu JJ. *Target volume delineation and field setup : a practical guide for conformal and intensity-modulated radiation therapy*.
6. Gomez DR, Zhung JE, Gomez J, et al. Intensity-modulated radiotherapy in postoperative treatment of oral cavity cancers. *International journal of radiation oncology, biology, physics*. 2009;73(4):1096-1103.
